# Supplementary material
Source: PubMed Central journal article supplement (PMC5563592)
Supplement: IAI.00127-17_zii999092141s1.pdf [file IAI.00127-17_zii999092141s1.pdf]

# Figure S1

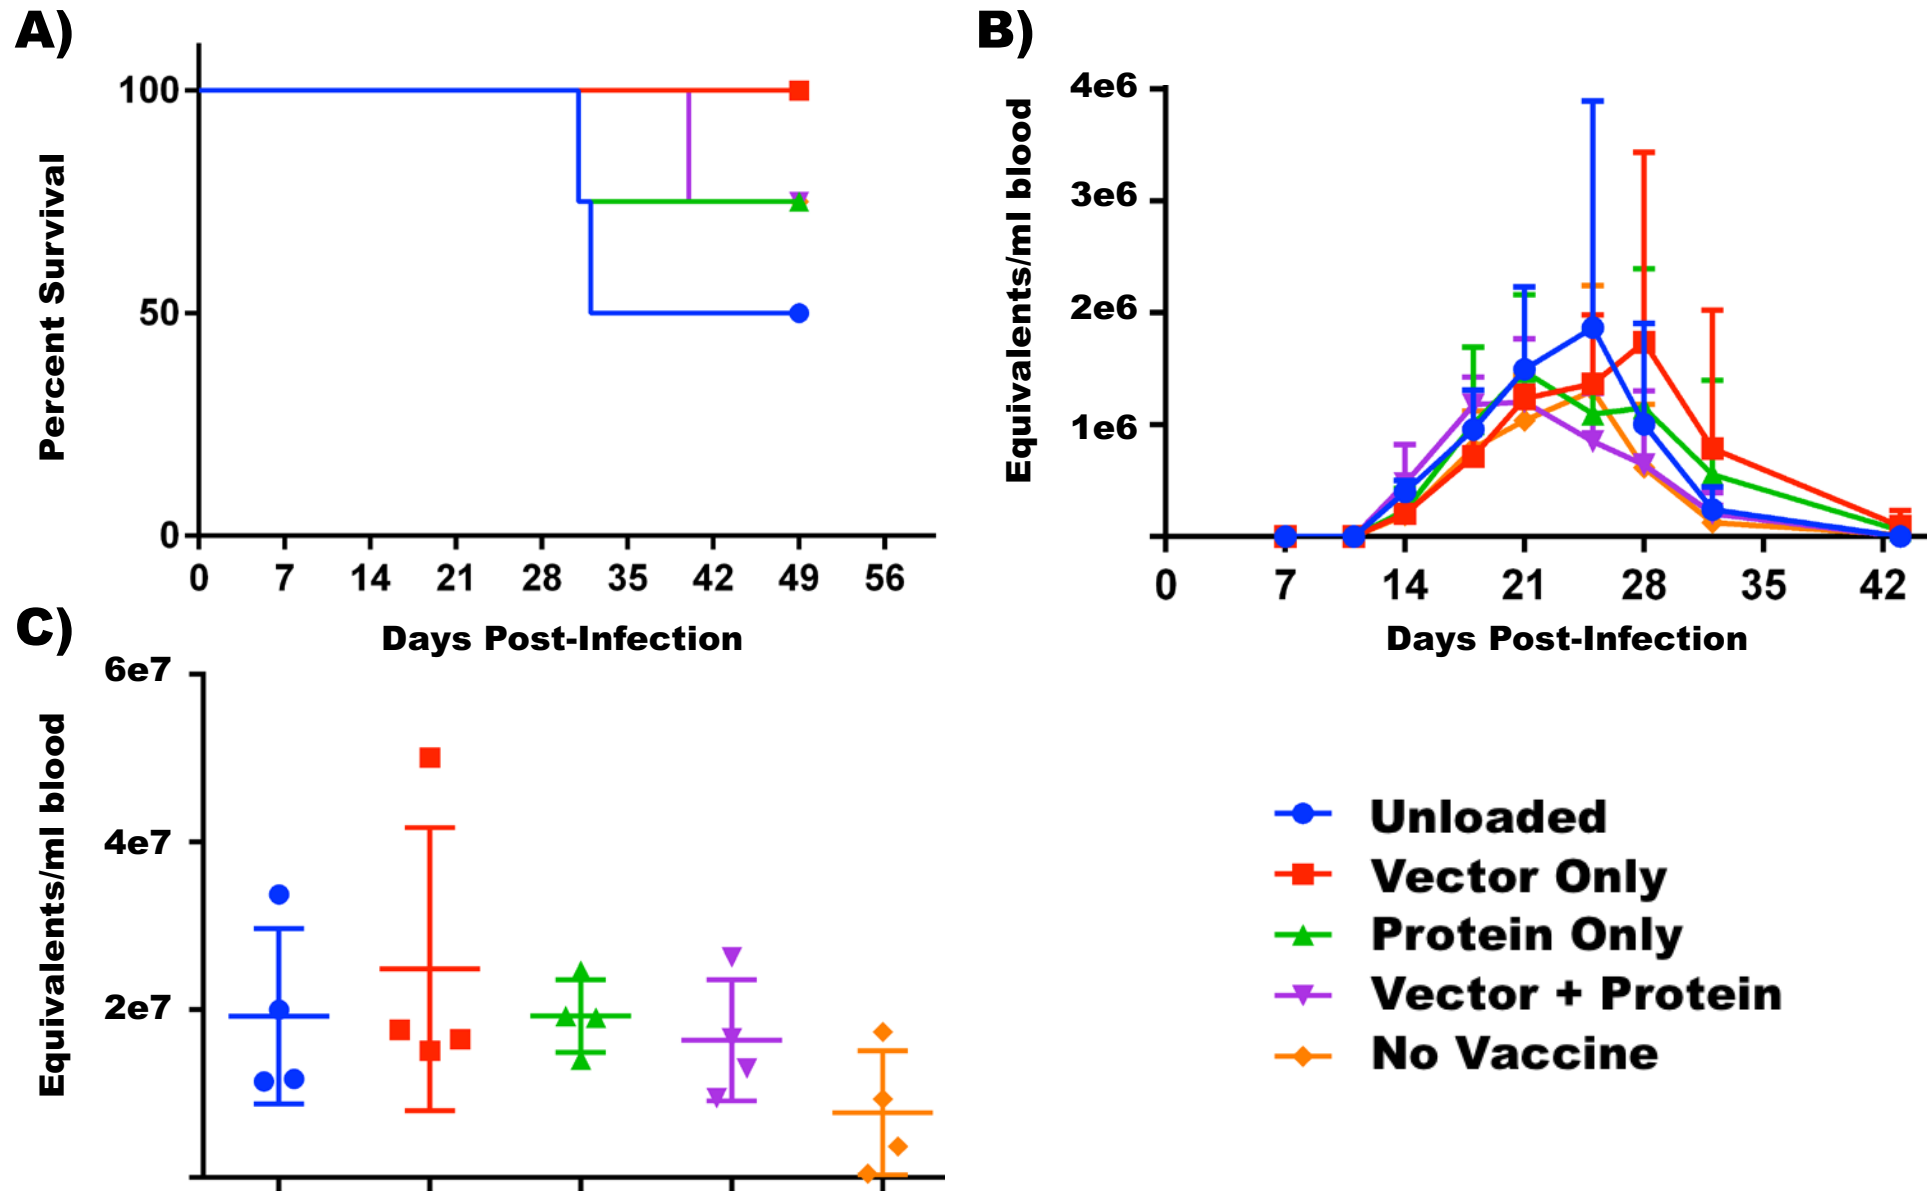

**Supplementary Figure Legend 1: Survival curves and blood form parasitemia.** (A)

Kaplan-Meier survival analysis of all infected groups indicated no significant differences in overall survival between day 0 (infection) and day 50 (sacrifice) as determined by log-rank (Mantle-Cox). (B) Total blood form parasitemia of each experimental group was quantitated by PCR of serial bleeds taken on post-infection days 7, 10, 14, 17, 21, 24, 28, 31, and 43. No statistically significant differences were observed between groups as determined by Kruskal-Wallis ANOVA with Dunn's multiple comparisons test. Y axis = parasite equivalents/ml whole blood. (C) Area under the curve (AUC) analysis of each individual animal's parasitemia curve also indicated no statistically significant differences in blood form parasitemia between groups. Y axis = parasite equivalents/ml whole blood. Experimental cohorts consisted of n = 4 - 5 animals each.
